# Supplementary material for: Controlled synthesis of mesoporous nanostructured anatase TiO2on a genetically modified Escherichia coli surface for high reversible capacity and long-life lithium-ion batteries
Source: Royal Society of Chemistry journal article supplement (doi:10.1039/c6ra09974b), 2016-01-01
Supplement: c6ra09974b1.pdf [file c6ra09974b1.pdf]

Supporting Information

## Controlled Synthesis of Mesoporous Nanostructured Anatase TiO<sub>2</sub> on Genetically Modified Escherichia coli Surface for High Reversible Capacity and Long-life Lithium-ion Batteries

Shuang-Hong Xue, Hao Xie\*, Hang Ping, Xiao-Mei Xu, Jing Li, Xiao-Yu Yang, Zheng-Yi Fu, Bao-Lian Su\*

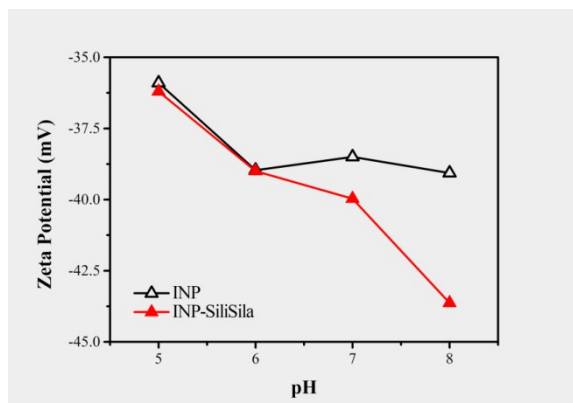

Fig. S1 Zeta potential of E. coli cells with INP or INP-SiliSila displaying on surface.

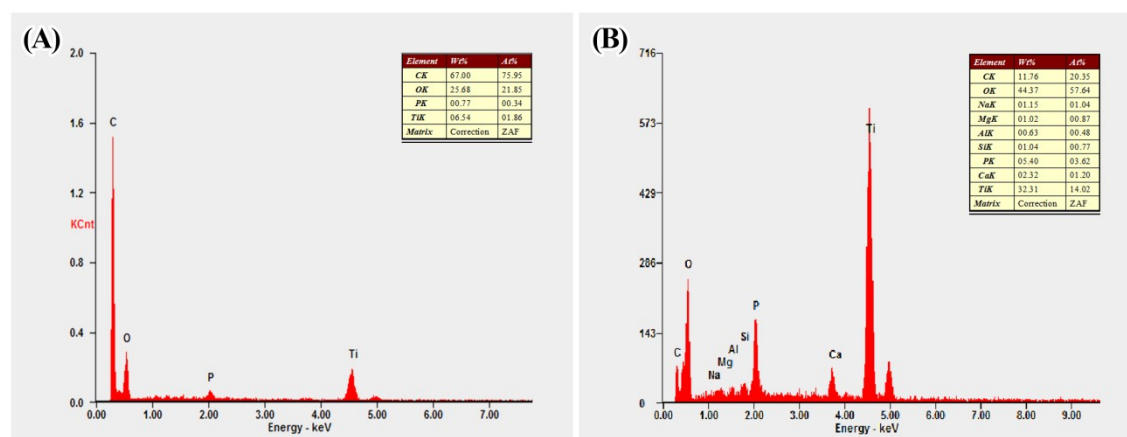

Fig. S2 The EDS spectrum shows TiO<sub>2</sub> deposition on bacterial surface before (Panel A) and after (Panel B) calcination.

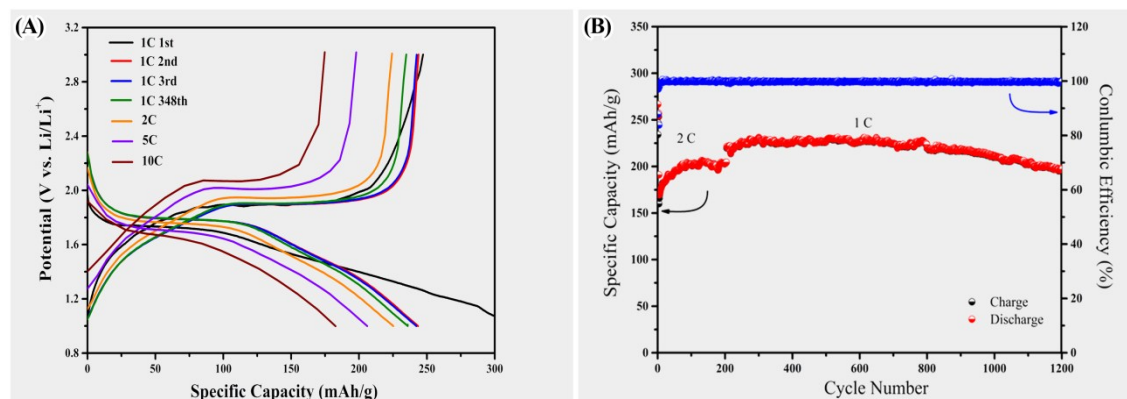

Fig. S3 Electrochemical performance of nanostructured anatase TiO<sub>2</sub> electrode. (A) Charge-discharge voltage profile at various current rate. (B) Ultralong-life cycling performance at a high current rate of 2C and 1C.

**Table S1: The relevant discharge capacities, charge capacities and irreversible capacity losses (ICL) at different current rate.**

| Current rate               | 1C    | 1C    | 1C    | 1C                | 2C    | 5C    | 10C   |
|----------------------------|-------|-------|-------|-------------------|-------|-------|-------|
| Cycle                      | 1st   | 2nd   | 3rd   | 348 <sup>th</sup> | 1st   | 1st   | 1st   |
| Discharge capacity         | 317   | 243.8 | 242.4 | 235.9             | 225.2 | 206.1 | 182.7 |
| Charge capacity            | 247.2 | 243.8 | 242.2 | 234.8             | 224.3 | 198   | 174.8 |
| Irreversible capacity loss | 22%   | 0.1%  | 0.08% | 0.05%             | 0.04% | 4%    | 4%    |

**Table S2: A comparison of the electrochemical performance between the as-prepared mesoporous nanostructured anatase TiO<sub>2</sub> and reported pure nanostructured TiO<sub>2</sub>.**

| Electrode Materials                                        | Specific Capacity (mAh/g) | Discharge Rate (1C=167mAh/g)                                                                       | Capacity Retention        | References                                                            |
|------------------------------------------------------------|---------------------------|----------------------------------------------------------------------------------------------------|---------------------------|-----------------------------------------------------------------------|
| <b>Mesoporous Nanostructured Anatase TiO<sub>2</sub></b>   |                           | 243 at 1C retain 97.1% (after 350 cycles)<br>200 at 2C retain 89% (after 200 cycles)<br>175 at 10C |                           | This work                                                             |
| Mesoporous hollow TiO <sub>2</sub> microspheres            | 347                       | 0.5C                                                                                               | 66.3% (after 100 cycles)  | <i>J Power Sources</i> <b>2011</b> , 196, 8618.                       |
| Mesoporous TiO <sub>2</sub> fiber                          | 190                       | 0.5C                                                                                               | 91.6% (after 100 cycles)  | <i>Electrochim Acta</i> <b>2015</b> , 180, 658.                       |
| TiO <sub>2</sub> hollow nano-Spheres                       | 295.2                     | 1C                                                                                                 | 71.8% (after 100 cycles)  | <i>Chemical Science</i> <b>2016</b> , 7, 793.                         |
| NYTiO <sub>2</sub> porous microspheres                     | 237                       | 1C                                                                                                 | 94.9% (after 100 cycles)  | <i>Nanoscale</i> <b>2015</b> , 7, 12979.                              |
| 3D interconnected macroporous TiO <sub>2</sub>             | 209                       | 1C                                                                                                 | 88.8% (after 200 cycles)  | <i>Rsc Advances</i> <b>2016</b> , 6, 26856.                           |
| Nanoporous Anatase TiO <sub>2</sub> Mesocrystals           | 204.7                     | 1C                                                                                                 | 74.2% (after 60 cycles)   | <i>J. Am. Chem. Soc.</i> <b>2011</b> , 133, 933.                      |
| Mesoporous TiO <sub>2</sub> microspheres                   | 191                       | 1C                                                                                                 | 84% (after 100 cycles)    | <i>Nanoscale</i> <b>2014</b> , 6, 14926.                              |
| Hierarchical mesoporous TiO <sub>2</sub> nanowire bundles  | 189                       | 1C                                                                                                 | 74.6% (after 100 cycles)  | <i>Advanced Science</i> <b>2015</b> , 2 (7).                          |
| Submicron-sized mesoporous anatase TiO <sub>2</sub> beads  | 172                       | 1C                                                                                                 | 85.1% (after 200 cycles)  | <i>Rsc Advances</i> <b>2013</b> , 3, 13149.                           |
| Mesoporous TiO <sub>2</sub> -B/anatase microparticles      | 247                       | 1C (1C=330 mAh/g)                                                                                  | 69.2% (after 80 cycles)   | <i>Chinese Journal of Chemical Engineering</i> <b>2015</b> , 23, 583. |
| Hierarchical 3D ordered macro-mesoporous TiO <sub>2</sub>  | 223                       | 4C                                                                                                 | 83.4% (after 50 cycles)   | <i>J Mater Chem A</i> <b>2014</b> , 2, 9699.                          |
| Hierarchically porous hollow TiO <sub>2</sub> microspheres | 158                       | 5C                                                                                                 | 82.9% (after 100 cycles)  | <i>Chemical Engineering Journal</i> <b>2013</b> , 228, 724.           |
| Mesoporous single-grain layer anatase nanosheets           | 120                       | 5C (1C=170 mAh/g)                                                                                  | 60.8% (after 4000 cycles) | <i>J Mater Chem A</i> <b>2015</b> , 3, 6455.                          |
| Mesoporous TiO <sub>2</sub> -B nanowires                   | 248                       | 6C                                                                                                 | 79% (after 50 cycles)     | <i>J Mater Sci</i> <b>2015</b> , 50, 6321.                            |
| Crystalline TiO <sub>2</sub> hollow spheres                | 184.1                     | 10C (1C=173 mAh/g)                                                                                 | 69.2% (after 1000 cycles) | <i>Science advances</i> <b>2016</b> , 2, e1501554.                    |
| Mesoporous anatase TiO <sub>2</sub>                        | 126                       | 10C                                                                                                | 98.5% (after 1100 cycles) | <i>J Alloy Compd</i> <b>2016</b> , 674, 174.                          |
| Mesoporous titania rods                                    | 262                       | 0.1 A/g                                                                                            | 81% (after 40 cycles)     | <i>J Power Sources</i> <b>2012</b> , 214, 298.                        |
| Mesoporous Titania Nanotubes                               | ~210                      | 10 A/g                                                                                             | 57% (after 30 cycles)     | <i>Advanced Materials</i> <b>2007</b> , 19, 3016.                     |

Note: The discharge-charge capacities of some TiO<sub>2</sub> materials have reached 395.2 at 1C current rate. Most of these TiO<sub>2</sub> materials reach the theoretical discharge-charge capacity of 167. The as-prepared TiO<sub>2</sub> material in the present study exhibit a discharge-charge capacity of 243 that is higher than most reported ones. Besides, the as-prepared TiO<sub>2</sub> materials show higher stability. It retains 97% of the discharge-charge capacity after 350 cycles at 10C current rate.

**Table S3: A comparison of the electrochemical performance between the as-prepared mesoporous nanostructured anatase TiO<sub>2</sub> and doped or composite TiO<sub>2</sub>.**

| Electrode Materials                                                     | Specific Capacity (mAh/g) | Discharge Rate (1C=167mAh/g)                                                                       | Capacity Retention        | References                                         |
|-------------------------------------------------------------------------|---------------------------|----------------------------------------------------------------------------------------------------|---------------------------|----------------------------------------------------|
| <b>Mesoporous Nanostructured Anatase TiO<sub>2</sub></b>                |                           | 243 at 1C retain 97.1% (after 350 cycles)<br>200 at 2C retain 89% (after 200 cycles)<br>175 at 10C |                           | This work                                          |
| Mesoporous MoS <sub>2</sub> -TiO <sub>2</sub> Nanofibers                | 165                       | 6C                                                                                                 | 75.2% (after 1000 cycles) | <i>Chemelectrochem</i> <b>2015</b> , 2, 374.       |
| Cr <sub>2</sub> O <sub>3</sub> @TiO <sub>2</sub> yolk/shell octahedrons | ~700                      | 0.5C                                                                                               | 72.8% (after 500 cycles)  | <i>Micropor Mesopor Mat</i> <b>2015</b> , 203, 86. |
| C-SnO <sub>2</sub> @TiO <sub>2</sub>                                    | ~480                      | 2000 mA/g                                                                                          | 78.5% (after 1000 cycles) | <i>Mater Lett</i>                                  |

|                                                                         |       |                |                           |                                                                      |
|-------------------------------------------------------------------------|-------|----------------|---------------------------|----------------------------------------------------------------------|
| mesoporous TiO <sub>2</sub> /SnO <sub>2</sub> /C hollow microspheres    | ~390  | 2000 mA/g      | 83% (after 500 cycles)    | 2015, 155, 142.<br><i>J Power Sources</i> <b>2015</b> , 279, 528.    |
| Ag/TiO <sub>2</sub> core-shell nanocables                               | 181   | 1C             | 88.4% (after 230 cycles)  | <i>New J Chem</i> <b>2015</b> , 39, 7889.                            |
| TiO <sub>2</sub> /MWCNT composites                                      | 316   | 0.2C           | 96.9% (after 100 cycles)  | <i>Acs Applied Materials &amp; Interfaces</i> <b>2015</b> , 7, 3676. |
| Hierarchical mesoporous SnO <sub>2</sub> @C@TiO <sub>2</sub> nanochains | 807   | 100 mA/g       | 45.7% (after 100 cycles)  | <i>Electrochim Acta</i> <b>2015</b> , 184, 219.                      |
| Submicron-sized mesoporous anatase TiO <sub>2</sub> @SnO <sub>2</sub>   | 731.5 | 1C             | 59.7% (after 850 cycles)  | <i>J Alloy Compd</i> <b>2015</b> , 639, 60.                          |
| H-TiO <sub>2</sub> /GC hollow spheres                                   | ~150  | 5C (1 A/g)     | 91.3% (after 1000 cycles) | <i>J. Am. Chem. Soc.</i> <b>2015</b> , 137, 13161.                   |
| mTiO <sub>2</sub> /Graphene/mTiO <sub>2</sub> Sandwich-Like Nanosheets  | 247   | 0.1C (20 mA/g) | 95.9% (after 100 cycles)  | <i>Nano Letters</i> <b>2015</b> , 15, 2186.                          |
| mesoporous hollow C/F/TiO <sub>2</sub>                                  | 252   | 0.5C           | 83.3% (after 100 cycles)  | <i>Electrochim Acta</i> <b>2015</b> , 157, 1.                        |
| mesoporous TiO <sub>2</sub> fibers@N-doped@carbon composite             | 125.1 | 10C            | 85.2% (after 500 cycles)  | <i>Nanoscale</i> <b>2015</b> , 7, 13898.                             |
| Mesoporous TiO <sub>2</sub> -Carbon                                     | 171   | 1C             | 76.6% (after 100 cycles)  | <i>J Electrochem Soc</i> <b>2015</b> , 162, D3013.                   |
| carbon coated TiO <sub>2</sub> nanoparticles                            | ~410  | 30 mA/g        | 65.9% (after 300 cycles)  | <i>J Alloy Compd</i> <b>2014</b> , 606, 61.                          |
| Carbon nanofiber-templated mesoporous TiO <sub>2</sub> nanotubs         | 108.1 | 2C             | 100% (after 500 cycles)   | <i>Rsc Advances</i> <b>2014</b> , 4, 9061.                           |
| Mesoporous 3D TiO <sub>2</sub> /CNTs                                    | 79    | 89C (15 A/g)   | 90% (after 900 cycles)    | <i>J Power Sources</i> <b>2014</b> , 254, 18.                        |
| hierarchical mesoporous TiO <sub>2</sub> -C sub-microspheres            | 212   | 1C             | 71.2% (after 50 cycles)   | <i>Rsc Advances</i> <b>2014</b> , 4, 19266.                          |
| mesoporous TiO <sub>2</sub> /graphene nanocomposite                     | ~160  | 5000 mA/g      | 88.6% (after 100 cycles)  | <i>Chem. Eng. J.</i> <b>2014</b> , 256, 247.                         |
| CNTs/mTiO <sub>2</sub> coaxial nanocables                               | ~190  | 1C             | 96.3% (after 70 cycles)   | <i>Carbon</i> <b>2014</b> , 75, 345.                                 |
| C-coated TiO <sub>2</sub> mesoporous microspheres                       | ~180  | 1C             | 87.4% (after 200 cycles)  | <i>Electrochim Acta</i> <b>2014</b> , 120, 231.                      |
| Cr, N-codoped mesoporous TiO <sub>2</sub> microspheres                  | 159.6 | 5C             | 99% (after 300 cycles)    | <i>J Mater Chem A</i> <b>2014</b> , 2, 1818.                         |
| Sandwich-like m-anatase TiO <sub>2</sub> Sheets/rGO                     | 230   | 1C             | 70% (after 50 cycles)     | <i>Rsc Advances</i> <b>2014</b> , 4, 43039.                          |
| Ordered mesoporous TiO <sub>2</sub> -C nanocomposite                    | 174   | 1C             | 95.4% (after 900 cycles)  | <i>J Mater Chem A</i> <b>2013</b> , 1, 4293.                         |
| Mesoporous anatase TiO <sub>2</sub> /3D GN                              | 314   | 0.5C           | 62.7% (after 100 cycles)  | <i>J Mater Chem A</i> <b>2013</b> , 1, 12750.                        |
| mesoporous 6% Sn-doped TiO <sub>2</sub> thin film                       | 575.7 | 0.5C           | 43.9% (after 80 cycles)   | <i>J Mater Chem A</i> <b>2013</b> , 1, 13222.                        |
| C&N co-doped mesoporous TiO <sub>2</sub>                                | ~200  | 1C             | 80% (after 100 cycles)    | <i>Rsc Advances</i> <b>2013</b> , 3, 3836.                           |
| Mesoporous TiO <sub>2</sub> /multilevel carbon networks                 | 152.1 | 5C             | 92% (after 3000 cycles)   | <i>Rsc Advances</i> <b>2013</b> , 3, 24882.                          |
| Mesoporous TiO <sub>2</sub> -Sn@C core-shell microspheres               | ~550  | 500 mA/g       | 37.5% (after 2000 cycles) | <i>Chem Commun</i> <b>2013</b> , 49, 2792.                           |
| 3D Mesoporous, micro/nanosized TiO <sub>2</sub> /C Nanocomposites       | 135.4 | 0.5 A/g        | 98.9% (after 100 cycles)  | <i>Acs Applied Materials &amp; Interfaces</i> <b>2012</b> , 4, 2985. |
| Ordered mesoporous carbon-TiO <sub>2</sub>                              | 618   | 0.1C           | 81% (after 80 cycles)     | <i>Carbon</i> <b>2012</b> , 50, 4259.                                |
| TiO <sub>2</sub> @reduced graphene oxide nanocomposite                  | 386.4 | 5C (1000 mA/g) | 39.5% (after 100 cycles)  | <i>J Mater Chem</i> <b>2012</b> , 22, 9759.                          |
| Zn doped mesoporous TiO <sub>2</sub>                                    | ~160  | 1C             | 87% (after 100 cycles)    | <i>J Mater Chem</i> <b>2012</b> , 22, 17625.                         |
| Sandwich-Like G-TiO <sub>2</sub> Nanosheets                             | 269   | 0.2C           | 67% (after 30 cycles)     | <i>Advanced Materials</i> <b>2011</b> , 23, 3575.                    |

Note: Comparing with doped or composite TiO<sub>2</sub>, the as-prepared TiO<sub>2</sub> in the present study exhibited higher than average electrochemical performance.
